# Supplementary material for: Analysis of Antioxidant Constituents from Ilex rotunda and Evaluation of Their Blood–Brain Barrier Permeability
Source: MDPI journal article supplement (doi:10.3390/antiox11101989), 2022-10-06

## ***Supplementary data***

### **Analysis of Antioxidant Constituents from *Ilex rotunda* and Evaluation of Their Blood-Brain Barrier Permeability**

Chang-Kwon Kim, Jeongjun Ahn, Jayeon Yu, DucDat Le, Sanghee Han, and Mina Lee\*

College of Pharmacy, Sunchon National University, 255 Jungangno, Suncheon-si 57922, Jeonnam,  
Republic of Korea

## Contents

|                                                                                                                                                                            |     |
|----------------------------------------------------------------------------------------------------------------------------------------------------------------------------|-----|
| <b>Figure S1.</b> UV and mass spectra of marker compounds ( <b>1-8</b> )                                                                                                   | S3  |
| <b>Figure S2.</b> DPPH (A) and ABTS (B) radical scavenging effects of the extract of <i>I. rotunda</i> twigs on various solvent ratios                                     | S4  |
| <b>Table S1.</b> Contents of eight marker compounds ( <b>1-8</b> ) in the extract of <i>I. rotunda</i> twigs                                                               | S5  |
| <b>Figure S3.</b> <sup>1</sup> H NMR (400 MHz, MeOH- <i>d</i> <sub>4</sub> ) spectrum of <b>1</b>                                                                          | S6  |
| <b>Figure S4.</b> <sup>13</sup> C NMR (100 MHz, MeOH- <i>d</i> <sub>4</sub> ) spectrum of <b>1</b>                                                                         | S6  |
| <b>Figure S5.</b> <sup>1</sup> H NMR (400 MHz, MeOH- <i>d</i> <sub>4</sub> ) spectrum of <b>2</b>                                                                          | S7  |
| <b>Figure S6.</b> <sup>13</sup> C NMR (100 MHz, MeOH- <i>d</i> <sub>4</sub> ) spectrum of <b>2</b>                                                                         | S7  |
| <b>Figure S7.</b> <sup>1</sup> H NMR (400 MHz, MeOH- <i>d</i> <sub>4</sub> ) spectrum of <b>3</b>                                                                          | S8  |
| <b>Figure S8.</b> <sup>13</sup> C NMR (100 MHz, MeOH- <i>d</i> <sub>4</sub> ) spectrum of <b>3</b>                                                                         | S8  |
| <b>Figure S9.</b> <sup>1</sup> H NMR (400 MHz, MeOH- <i>d</i> <sub>4</sub> ) spectrum of <b>4</b>                                                                          | S9  |
| <b>Figure S10.</b> <sup>13</sup> C NMR (100 MHz, MeOH- <i>d</i> <sub>4</sub> ) spectrum of <b>4</b>                                                                        | S9  |
| <b>Figure S11.</b> <sup>1</sup> H NMR (400 MHz, MeOH- <i>d</i> <sub>4</sub> ) spectrum of <b>5</b>                                                                         | S10 |
| <b>Figure S12.</b> <sup>13</sup> C NMR (100 MHz, MeOH- <i>d</i> <sub>4</sub> ) spectrum of <b>5</b>                                                                        | S10 |
| <b>Figure S13.</b> <sup>1</sup> H NMR (400 MHz, MeOH- <i>d</i> <sub>4</sub> ) spectrum of <b>6</b>                                                                         | S11 |
| <b>Figure S14.</b> <sup>13</sup> C NMR (100 MHz, MeOH- <i>d</i> <sub>4</sub> ) spectrum of <b>6</b>                                                                        | S11 |
| <b>Figure S15.</b> <sup>1</sup> H NMR (400 MHz, MeOH- <i>d</i> <sub>4</sub> ) spectrum of <b>7</b>                                                                         | S12 |
| <b>Figure S16.</b> <sup>13</sup> C NMR (100 MHz, MeOH- <i>d</i> <sub>4</sub> ) spectrum of <b>7</b>                                                                        | S12 |
| <b>Figure S17.</b> <sup>1</sup> H NMR (400 MHz, MeOH- <i>d</i> <sub>4</sub> ) spectrum of <b>8</b>                                                                         | S13 |
| <b>Figure S18.</b> <sup>13</sup> C NMR (100 MHz, MeOH- <i>d</i> <sub>4</sub> ) spectrum of <b>8</b>                                                                        | S13 |
| <b>Figure S19.</b> PAMPA-BBB permeability test result for <i>I. rotunda</i> ext. (10 mg/ml) and detailed calculation procedure of permeability value for compound <b>7</b> | S14 |
| <b>Figure S20.</b> PAMPA-BBB permeability test results for compounds <b>1-8</b> (10 mM)                                                                                    | S15 |

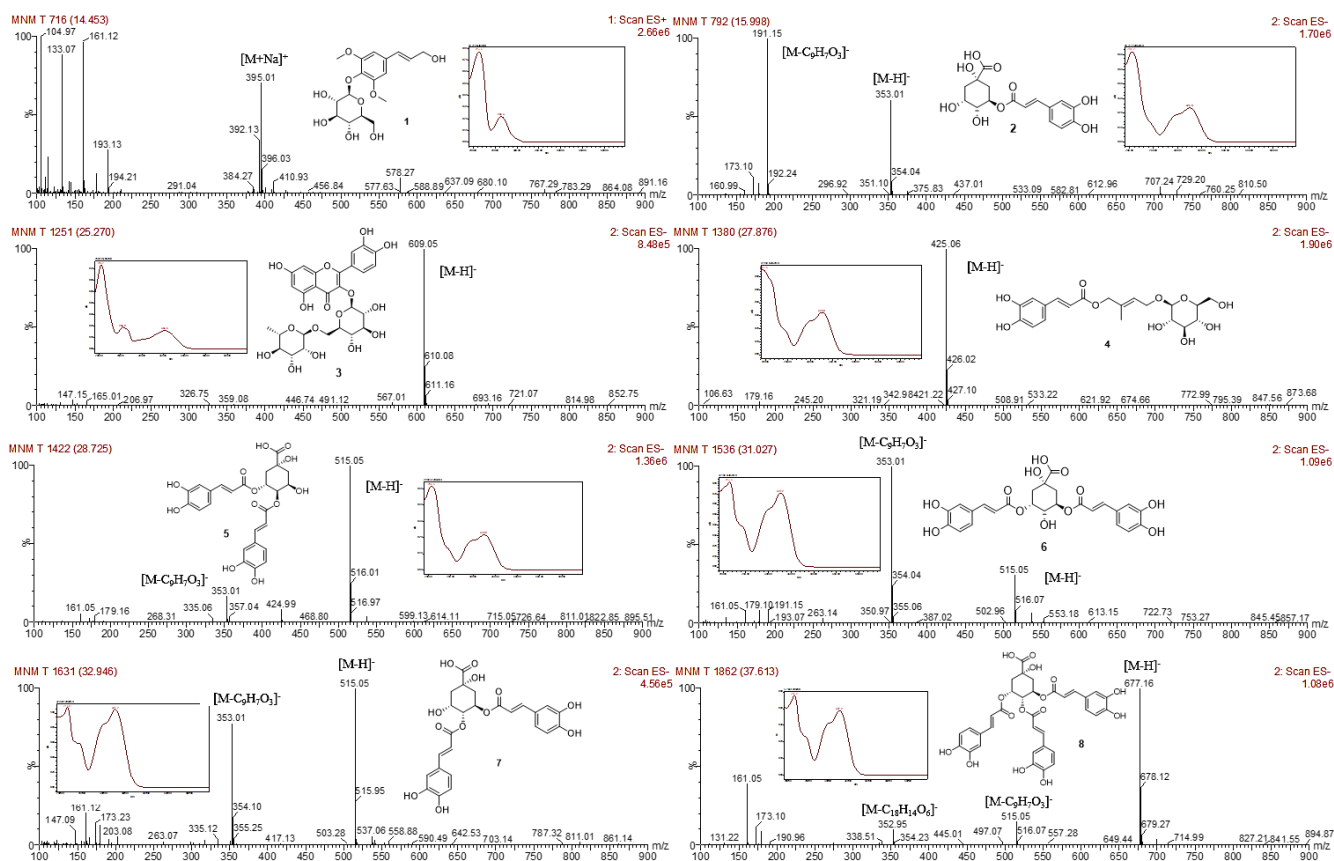

Figure S1. UV and mass spectra of marker compounds (1-8)

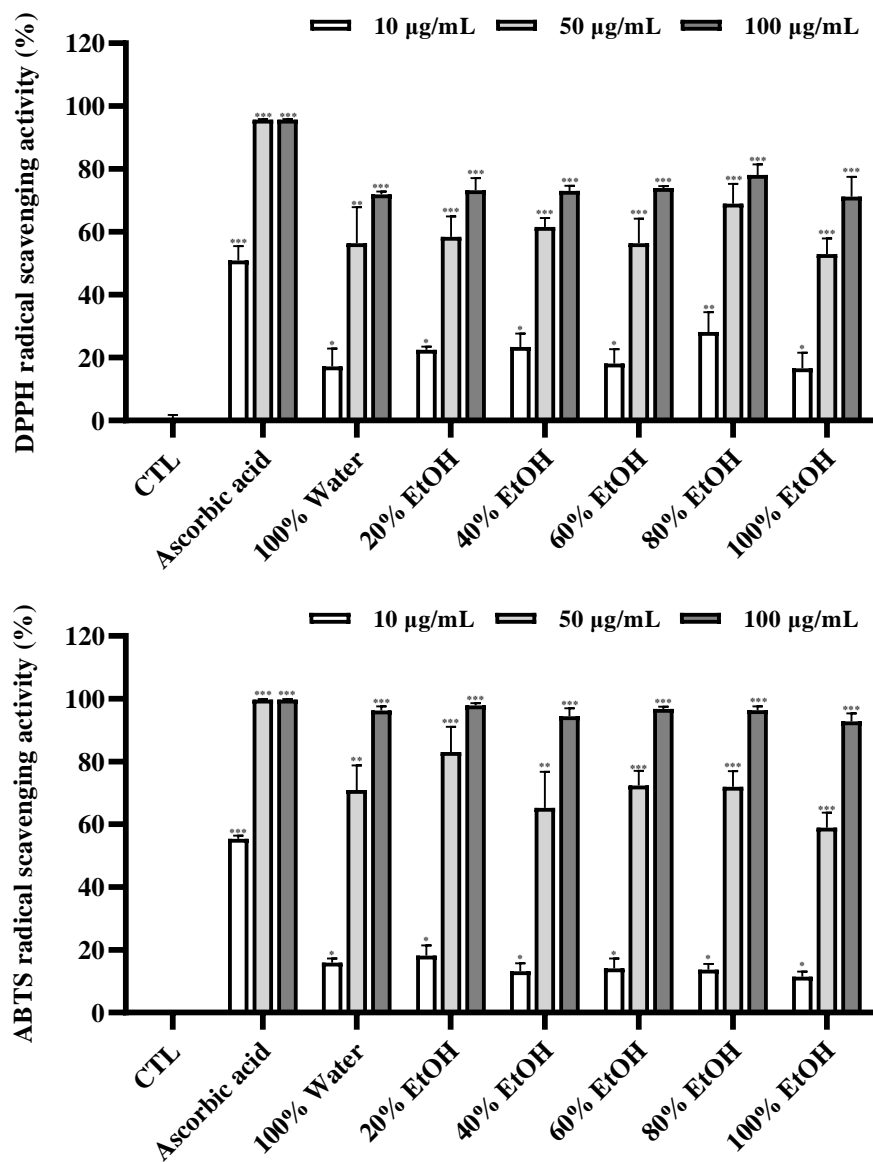

**Figure S2.** DPPH (A) and ABTS (B) radical scavenging effects of the extract of *I. rotunda* twigs on various solvent ratios. The data are expressed as the mean  $\pm$  SD ( $n = 3$ ) of three individual experiments. \*  $p < 0.05$ , \*\*  $p < 0.01$  and \*\*\*  $p < 0.001$ , compared with control.

**Table S1.** Contents of eight marker compounds (**1-8**) in the extract of *I. rotunda* twigs.

| Marker compounds                          | Amount (ppm)  | Content (mg/g) |
|-------------------------------------------|---------------|----------------|
| syringin ( <b>1</b> )                     | 112.04 ± 0.45 | 16.72          |
| chlorogenic acid ( <b>2</b> )             | 258.25 ± 2.71 | 38.54          |
| rutin ( <b>3</b> )                        | 57.74 ± 0.24  | 8.62           |
| rotundarpenoside B ( <b>4</b> )           | 237.41 ± 1.83 | 35.43          |
| 3,4-dicaffeoylquinic acid ( <b>5</b> )    | 237.58 ± 1.10 | 35.45          |
| 3,5-dicaffeoylquinic acid ( <b>6</b> )    | 487.67 ± 2.13 | 72.77          |
| 4,5-dicaffeoylquinic acid ( <b>7</b> )    | 626.10 ± 3.88 | 93.43          |
| 3,4,5-tricaffeoylquinic acid ( <b>8</b> ) | 335.2 ± 1.43  | 50.02          |

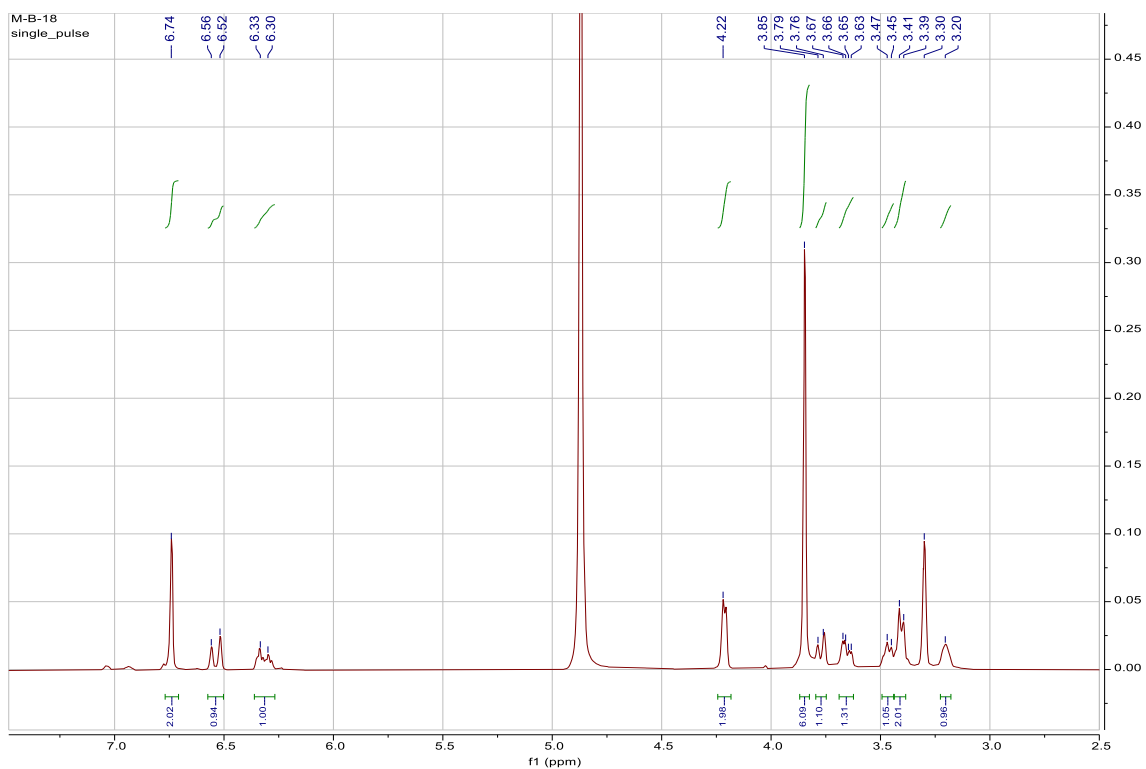

**Figure S3.  $^1\text{H}$  NMR (400 MHz,  $\text{MeOH-}d_4$ ) spectrum of **1****

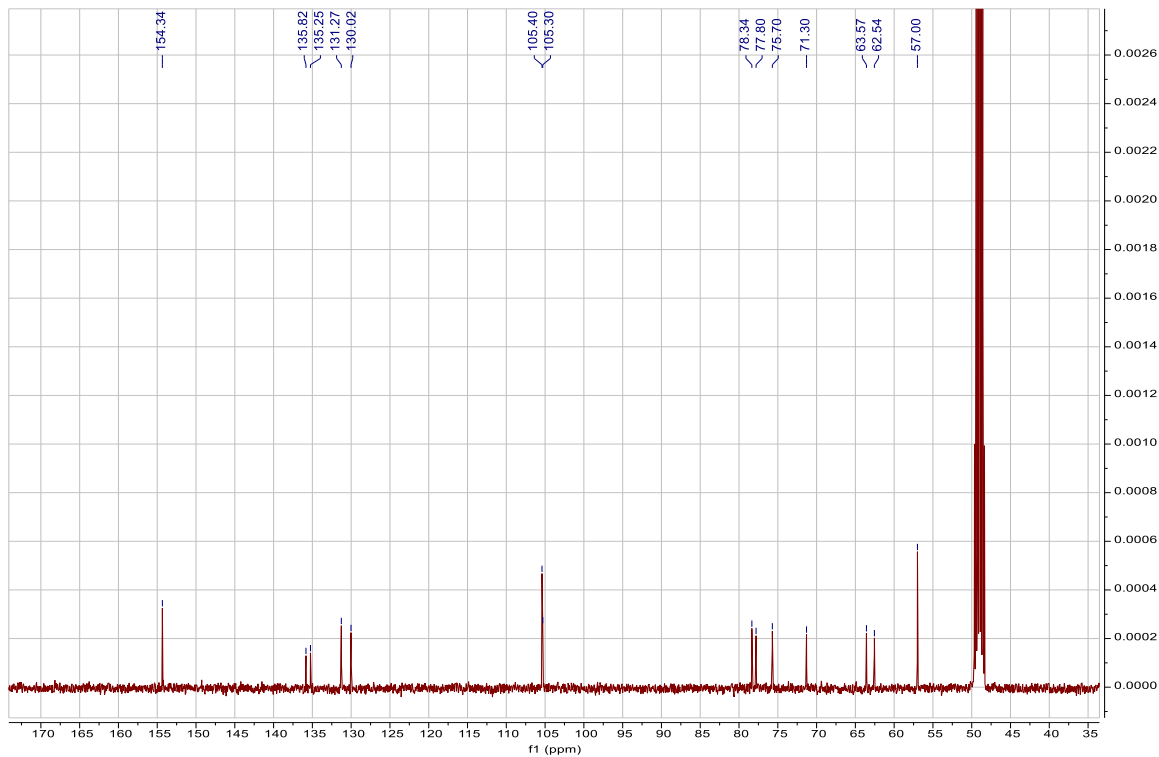

**Figure S4.  $^{13}\text{C}$  NMR (100 MHz,  $\text{MeOH-}d_4$ ) spectrum of **1****

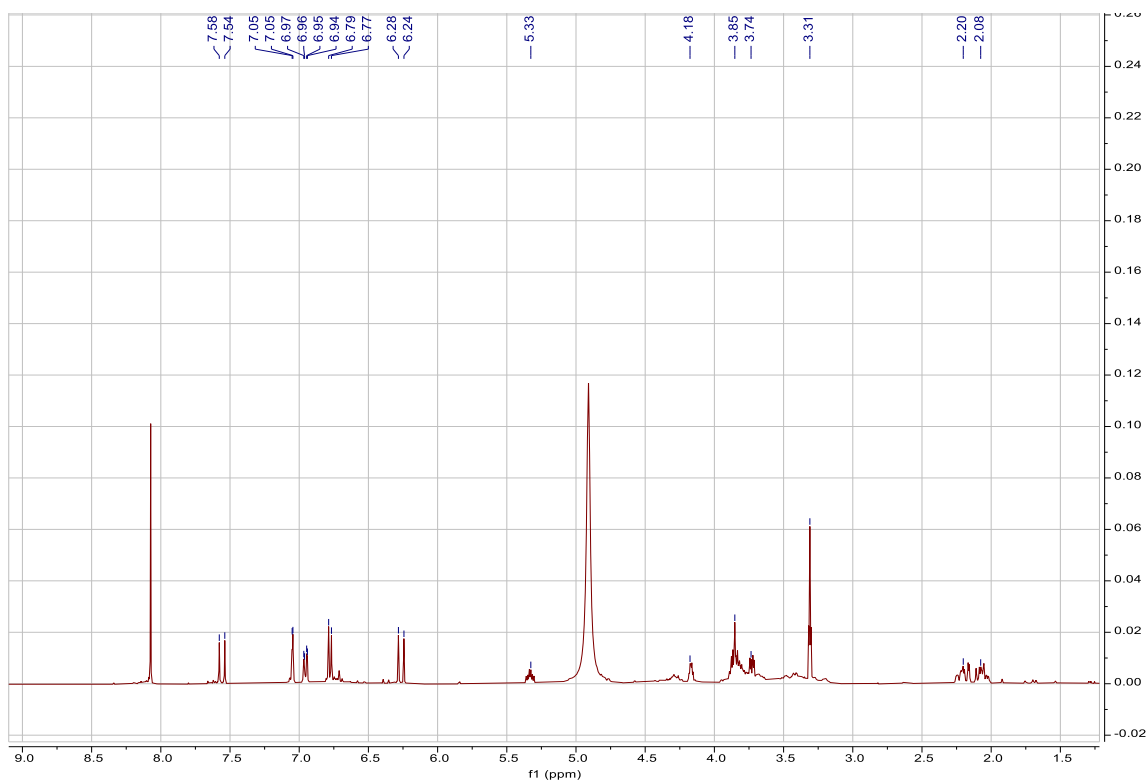

**Figure S5.**  $^1\text{H}$  NMR (400 MHz,  $\text{MeOH-}d_4$ ) spectrum of **2**

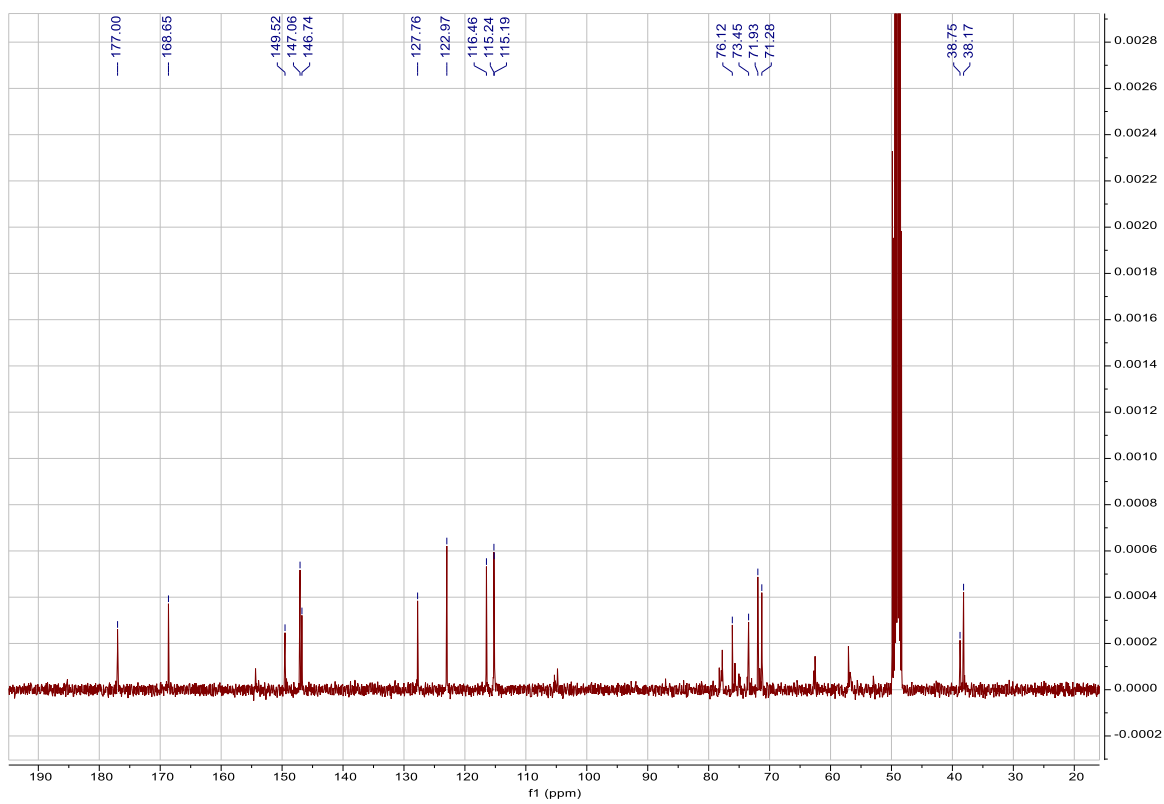

**Figure S6.**  $^{13}\text{C}$  NMR (100 MHz,  $\text{MeOH-}d_4$ ) spectrum of **2**

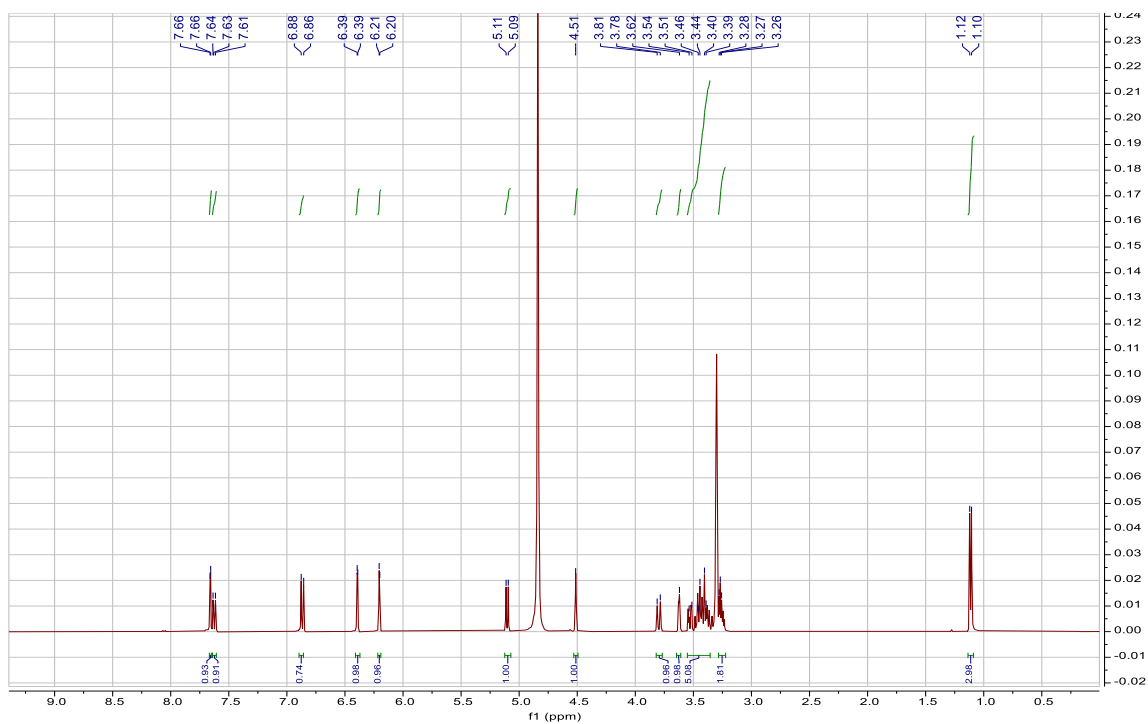

**Figure S7.** <sup>1</sup>H NMR (400 MHz, MeOH-*d*<sub>4</sub>) spectrum of **3**

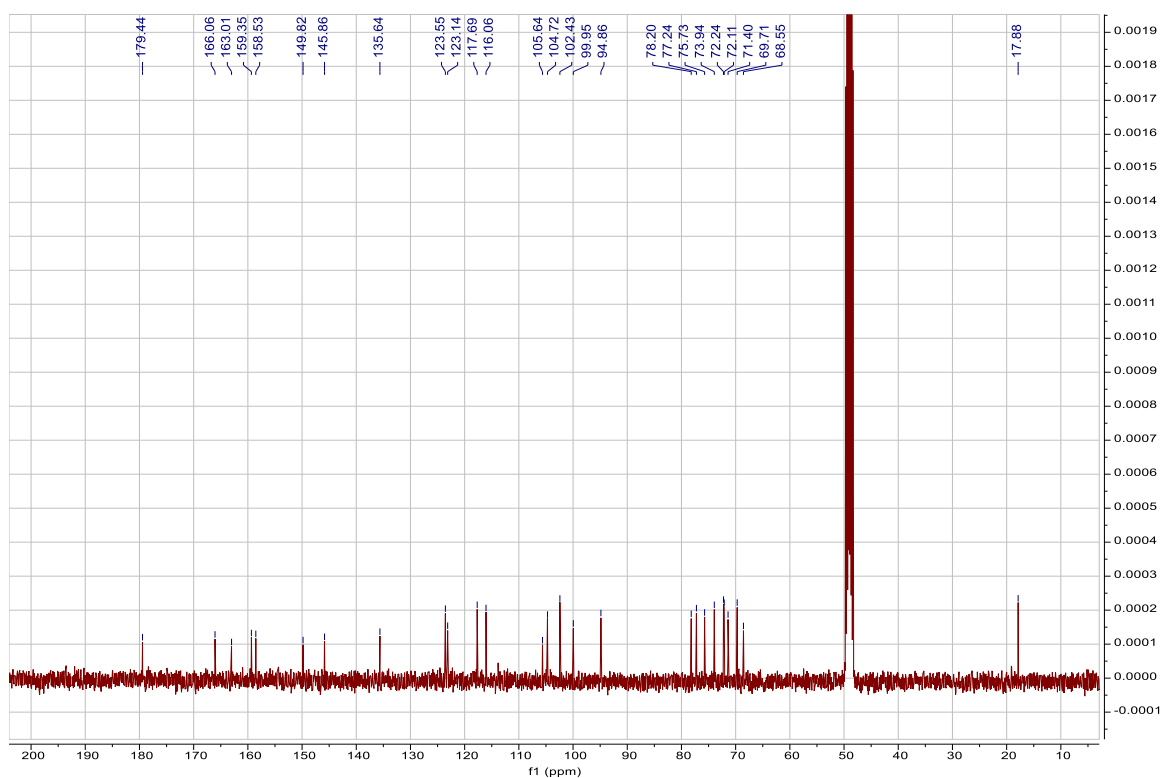

**Figure S8.** <sup>13</sup>C NMR (100 MHz, MeOH-*d*<sub>4</sub>) spectrum of **3**

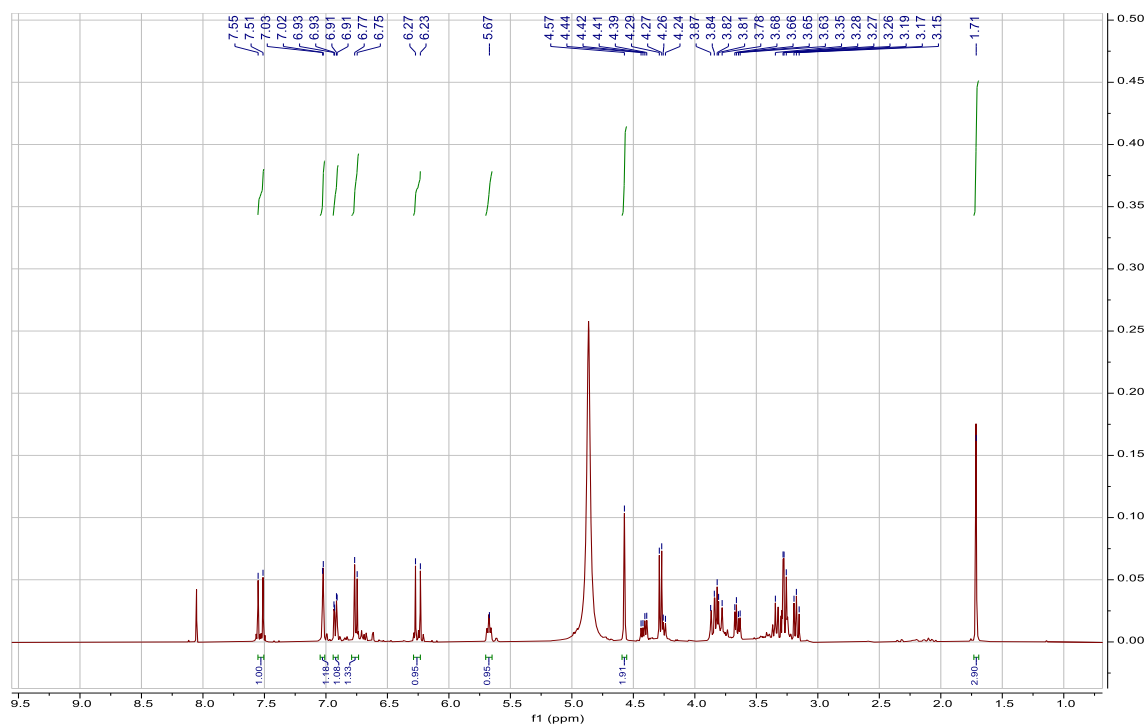

**Figure S9.** <sup>1</sup>H NMR (400 MHz, MeOH-*d*<sub>4</sub>) spectrum of **4**

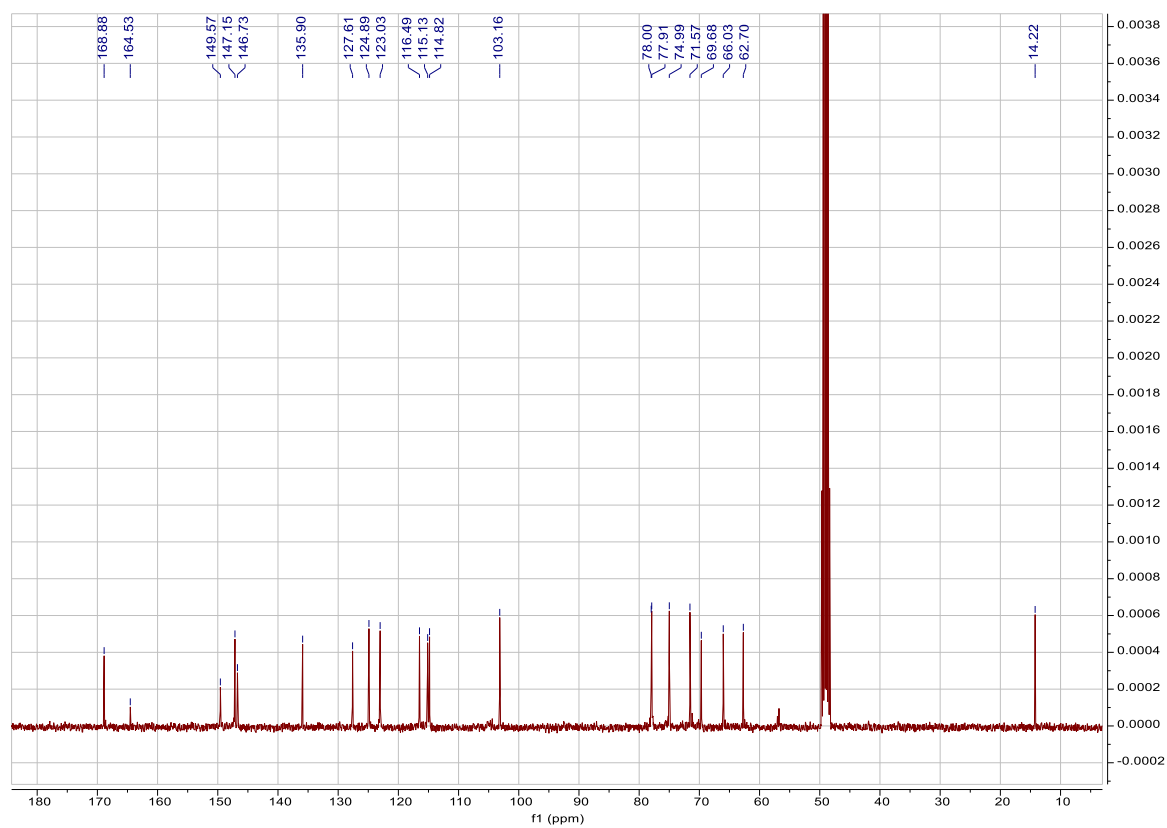

**Figure S10.** <sup>13</sup>C NMR (100 MHz, MeOH-*d*<sub>4</sub>) spectrum of **4**

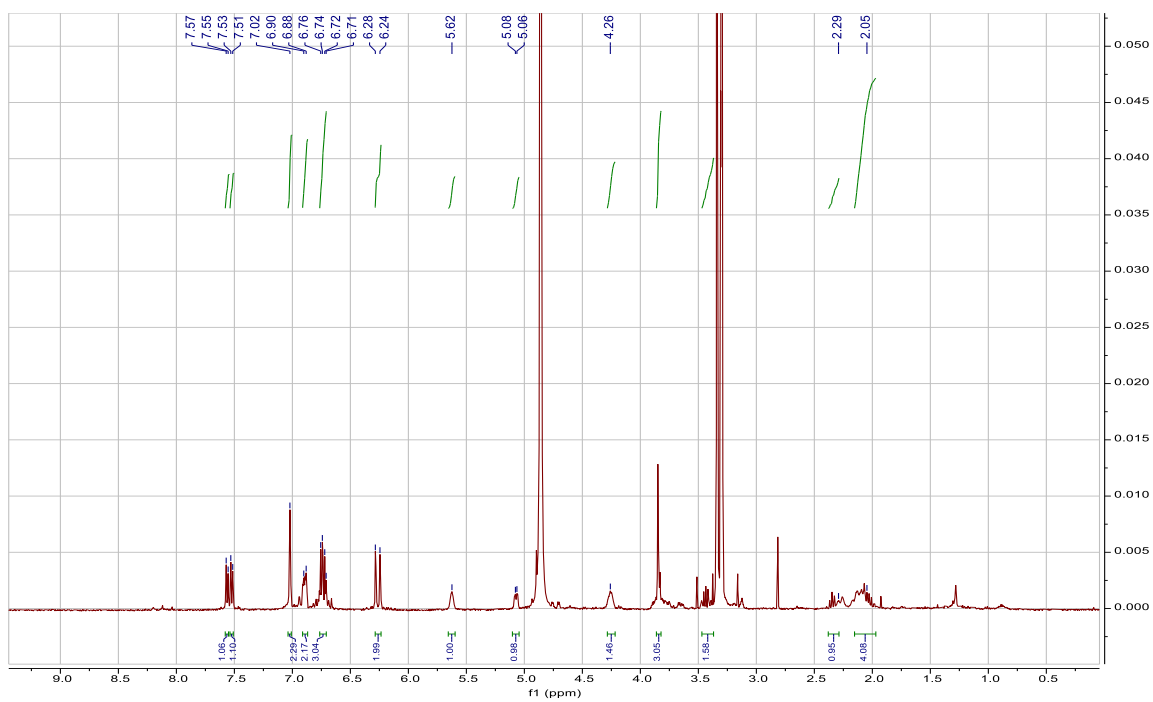

**Figure S11.** <sup>1</sup>H NMR (400 MHz, MeOH-*d*<sub>4</sub>) spectrum of **5**

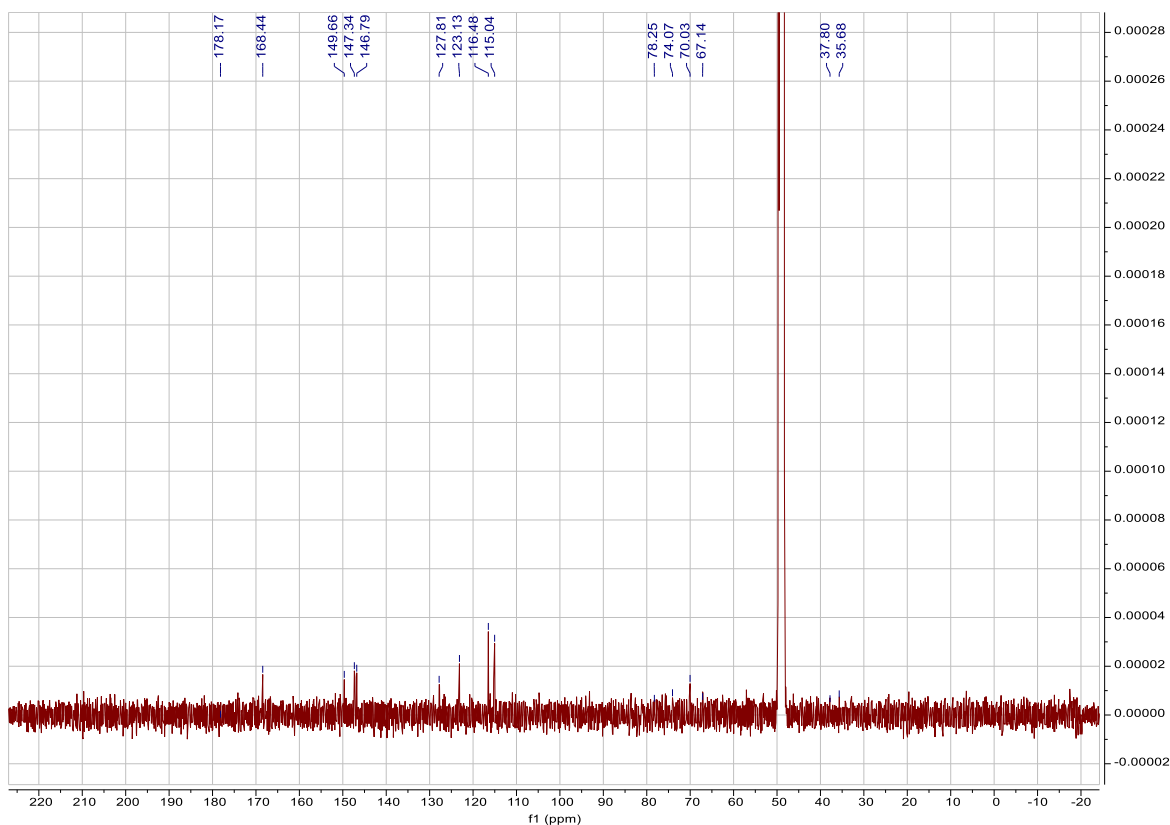

**Figure S12.** <sup>13</sup>C NMR (100 MHz, MeOH-*d*<sub>4</sub>) spectrum of **5**

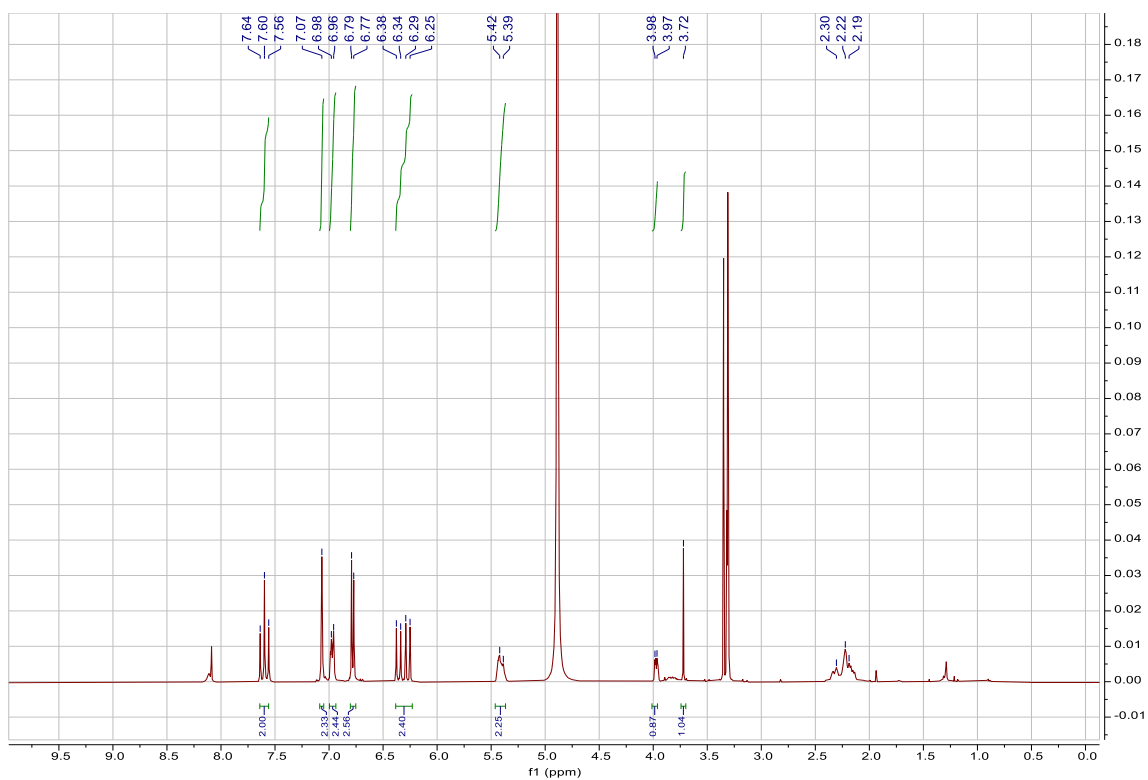

**Figure S13.** <sup>1</sup>H NMR (400 MHz, MeOH-*d*<sub>4</sub>) spectrum of **6**

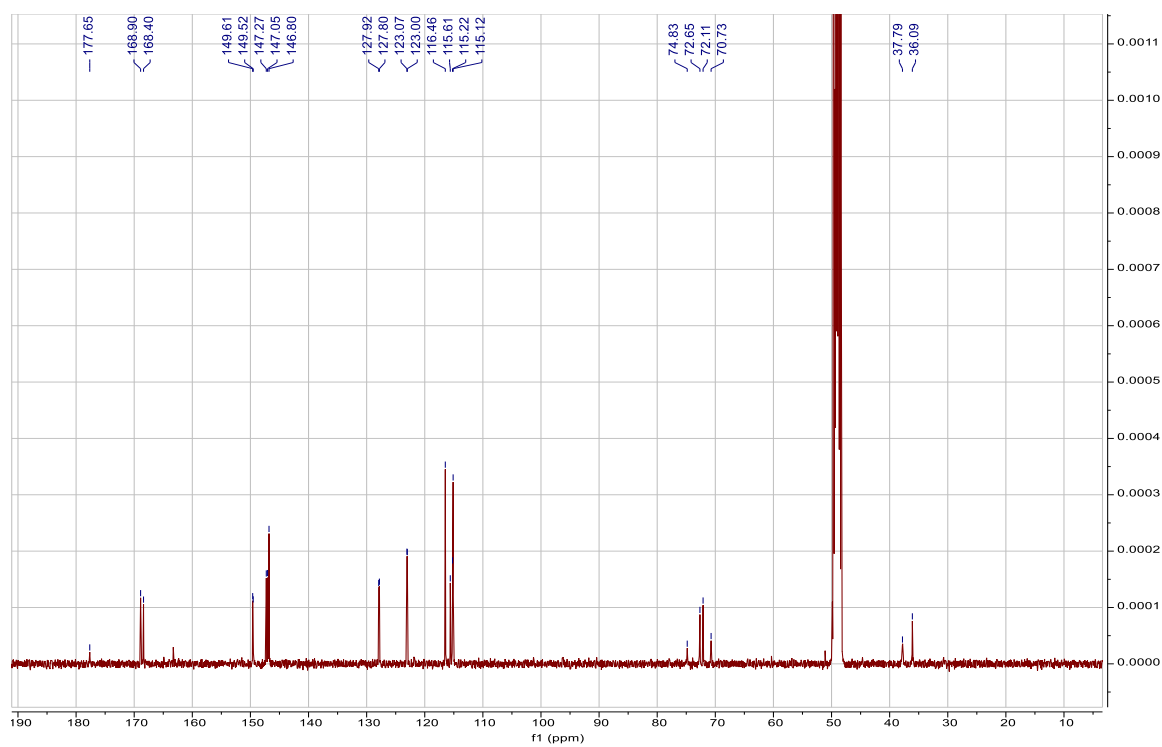

**Figure S14.** <sup>13</sup>C NMR (100 MHz, MeOH-*d*<sub>4</sub>) spectrum of **6**

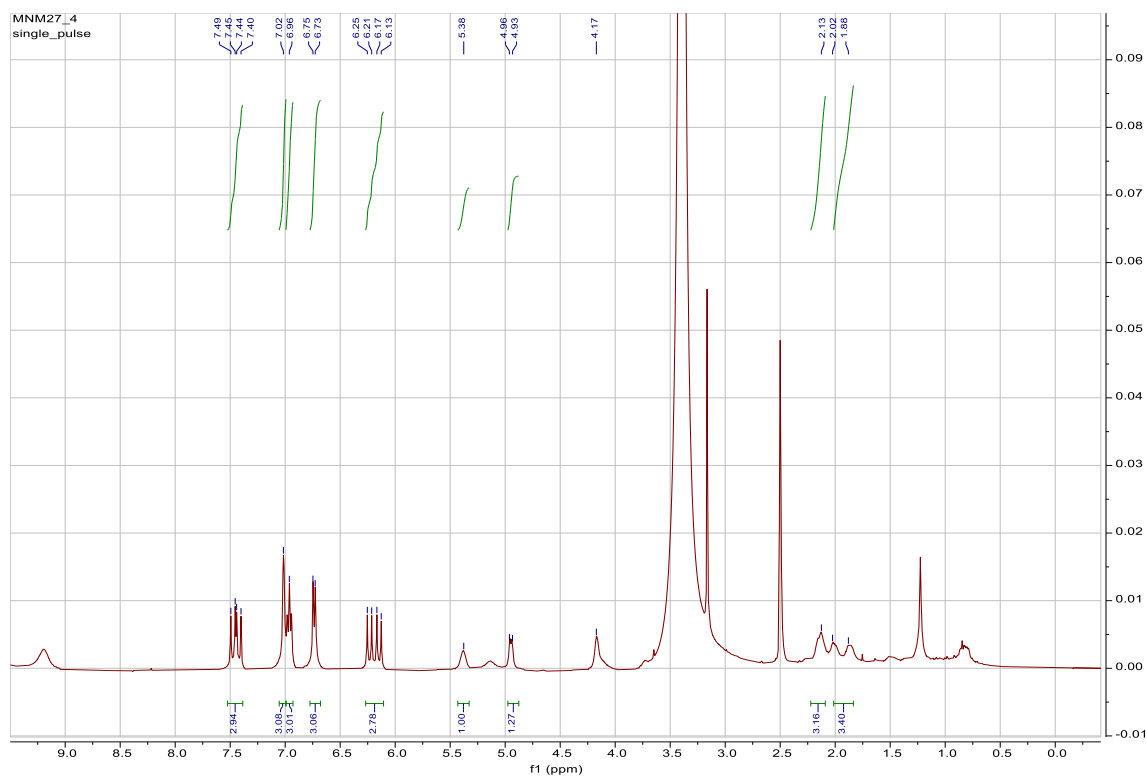

**Figure S15.** <sup>1</sup>H NMR (400 MHz, DMSO-*d*<sub>6</sub>) spectrum of **7**

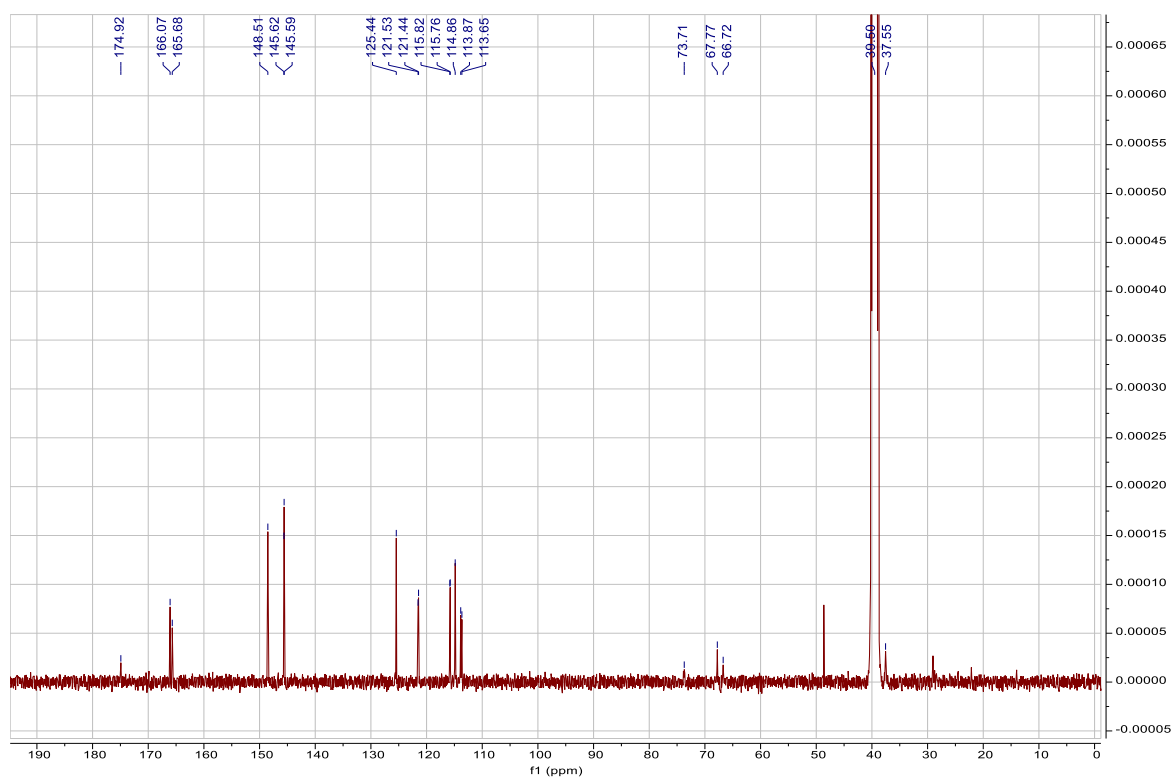

**Figure S16.** <sup>13</sup>C NMR (100 MHz, DMSO-*d*<sub>6</sub>) spectrum of **7**

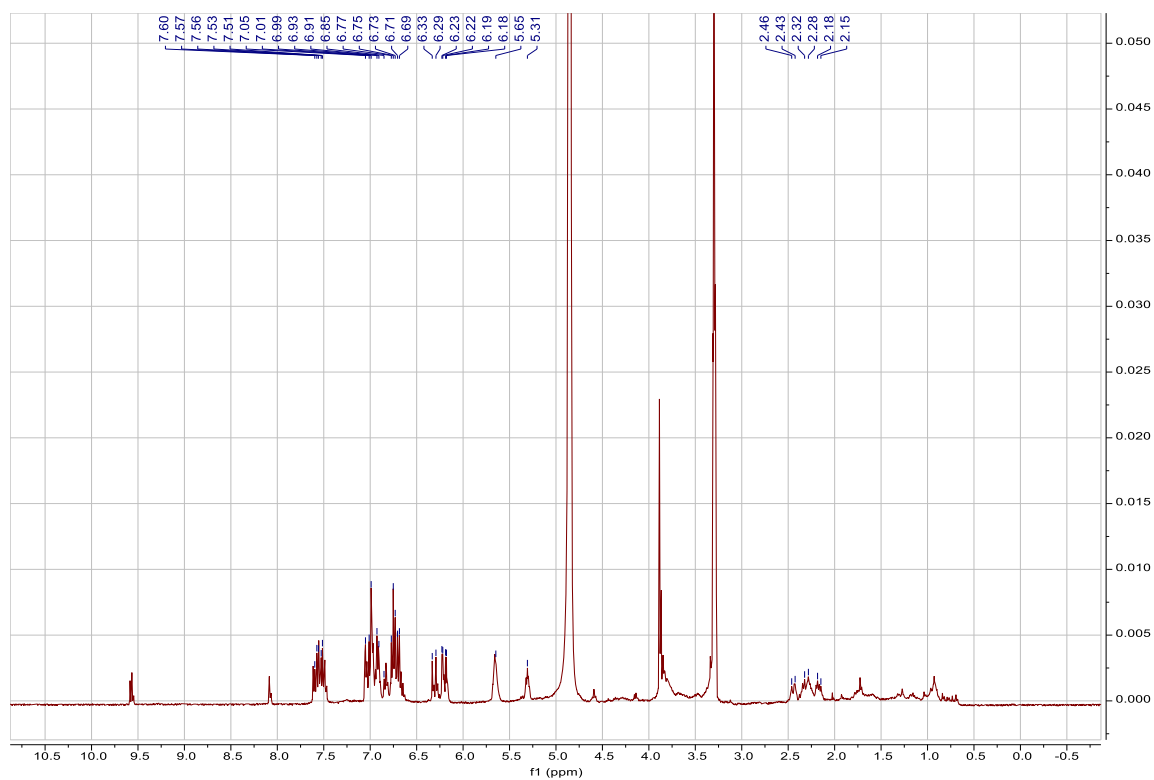

**Figure S17.**  $^1\text{H}$  NMR (400 MHz,  $\text{MeOH-}d_4$ ) spectrum of **8**

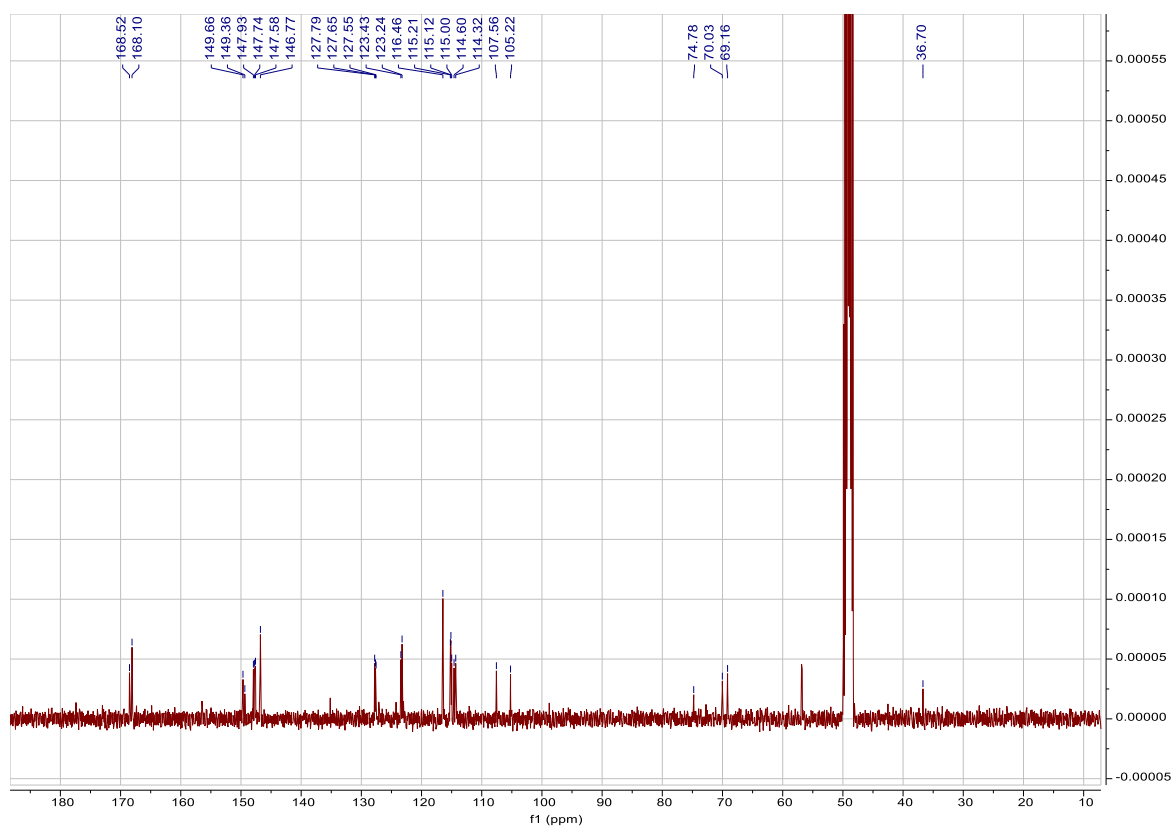

**Figure S18.**  $^{13}\text{C}$  NMR (100 MHz,  $\text{MeOH-}d_4$ ) spectrum of **8**

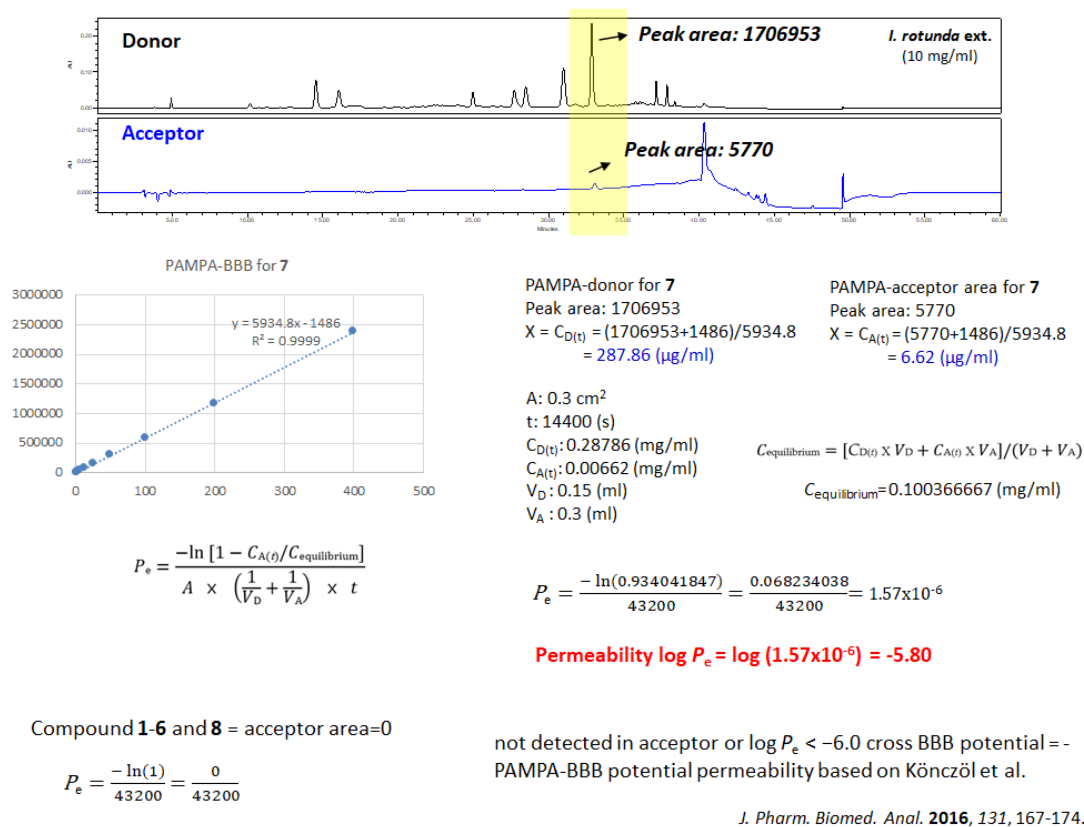

**Figure S19.** PAMPA-BBB permeability test result for *I. rotunda* ext. (10 mg/ml) and detailed calculation procedure of permeability value for compound **7**

**Figure S20.** PAMPA-BBB permeability test results for compounds **1-8** (10 mM)

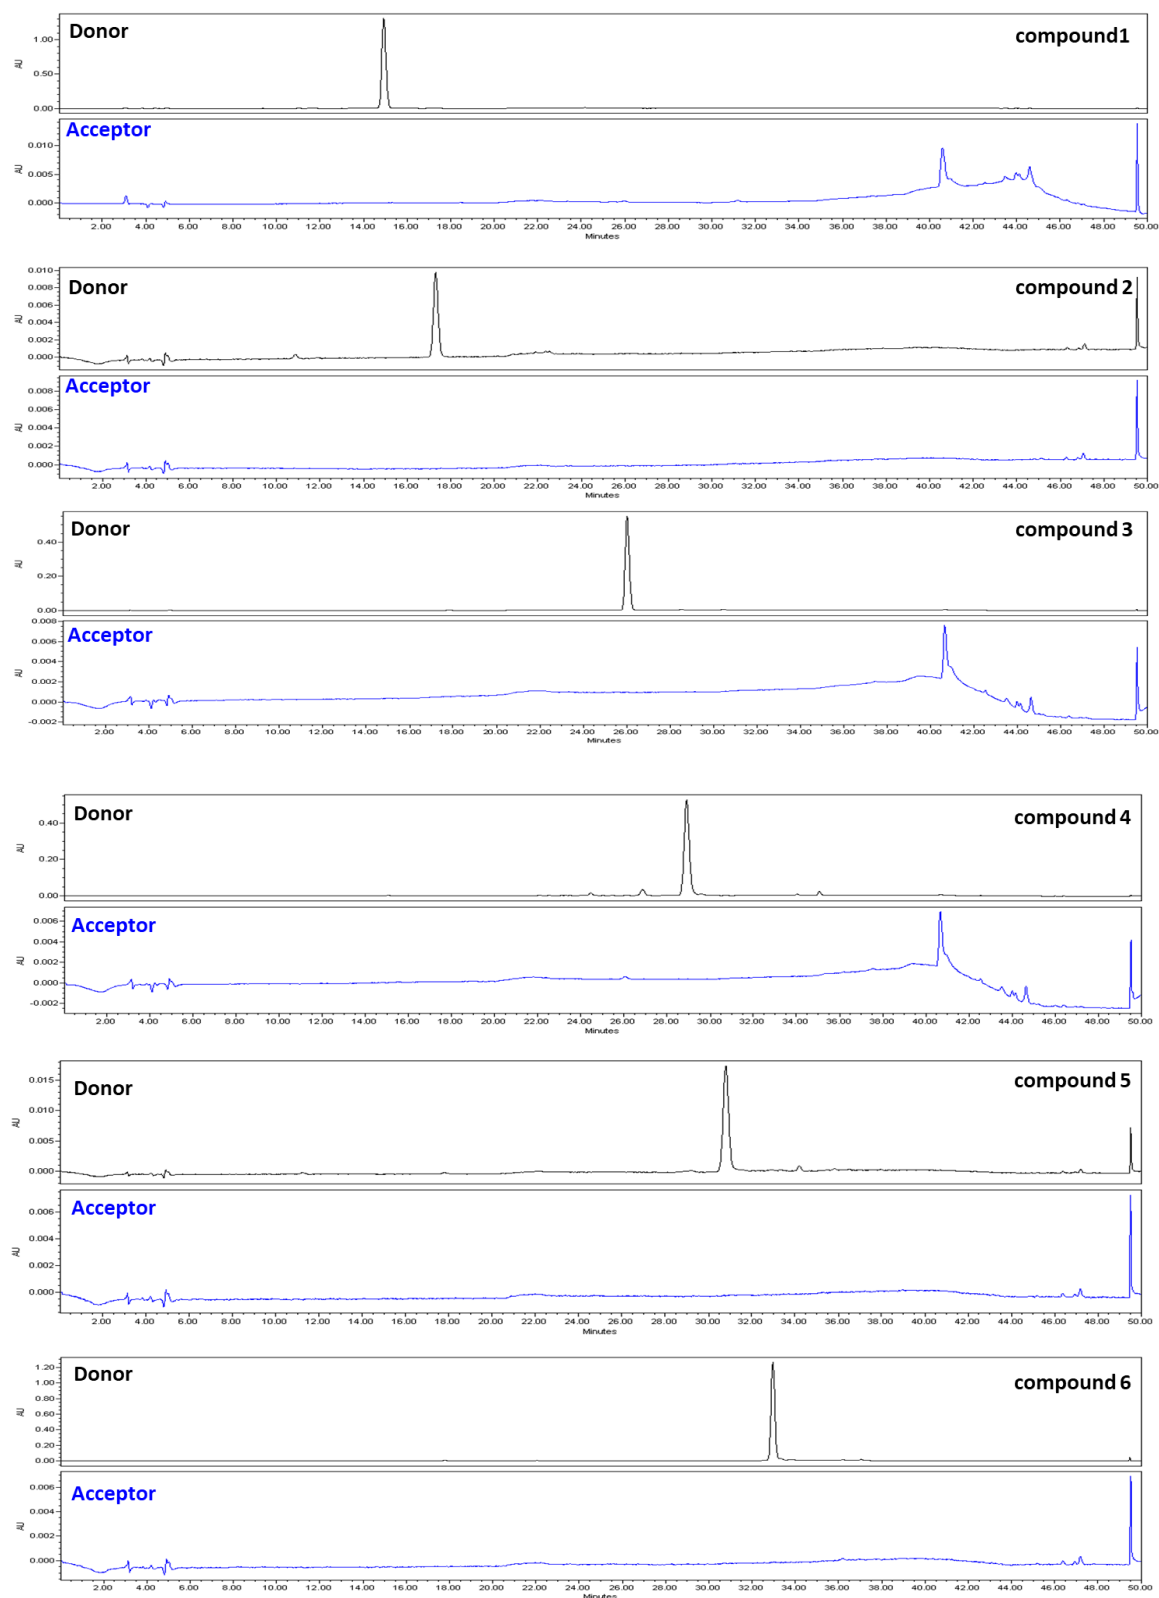

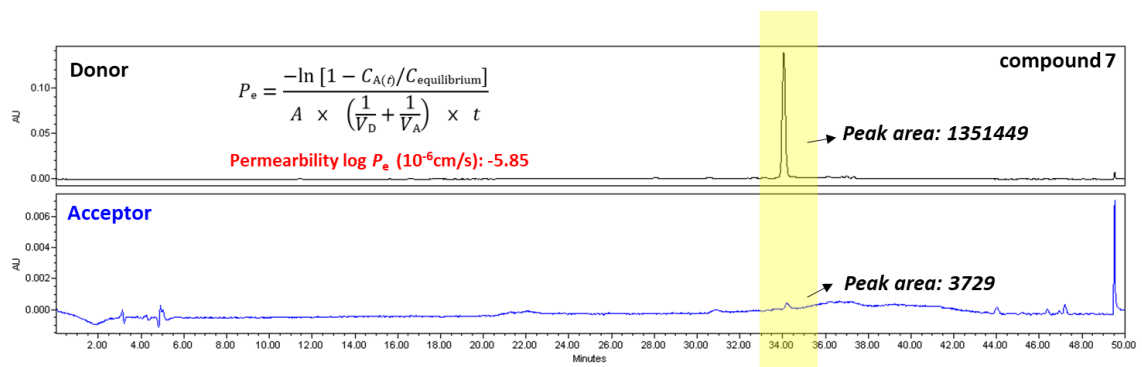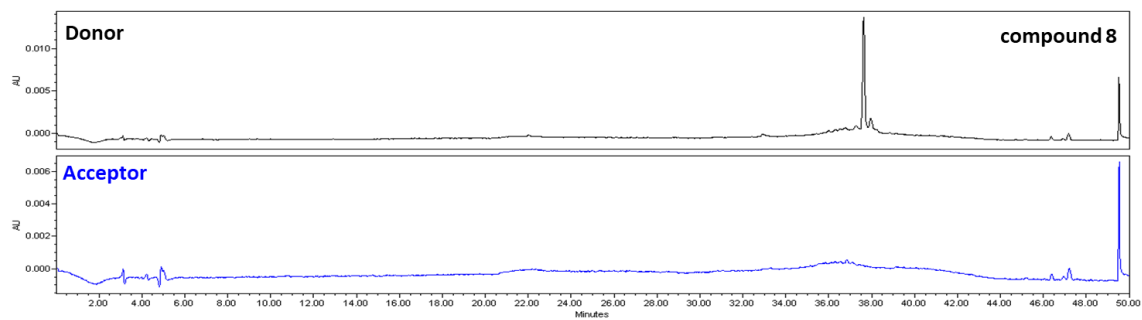

Supplement: s1 [file s1]
